# Supplementary material for: Simulation of ozone–vegetation coupling and feedback in China using multiple ozone damage schemes
Source: Copernicus journal article supplement (doi:10.5194/acp-24-3973-2024), 2024-04-03
Supplement: Supplementary file 1 [file acp-24-3973-2024-supplement.pdf]

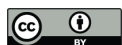

*Supplement of*

## **Simulation of ozone–vegetation coupling and feedback in China using multiple ozone damage schemes**

**Jiachen Cao et al.**

*Correspondence to:* Xu Yue (yuexu@nuist.edu.cn)

The copyright of individual parts of the supplement might differ from the article licence.

**Figure S1**

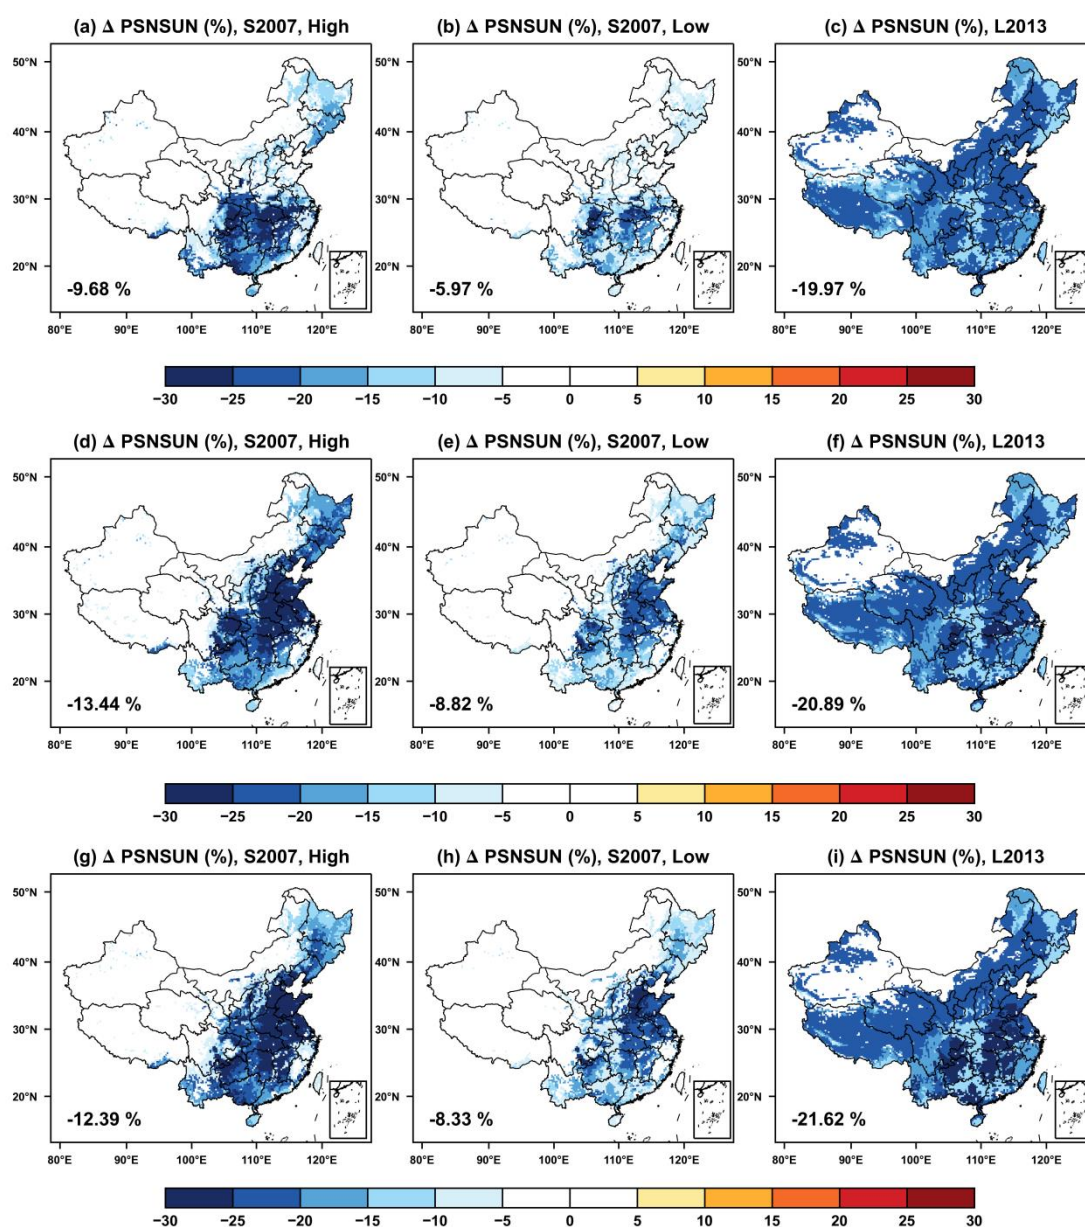

**Figure S1** Offline O<sub>3</sub> damage (%) to the summertime photosynthesis of sunlit leaves in (a-c) June, (d-f) July, and (g-i) August for different O<sub>3</sub> damage schemes and sensitivities. The area-weighted percentage changes are shown in the lower left corner.

**Figure S2**

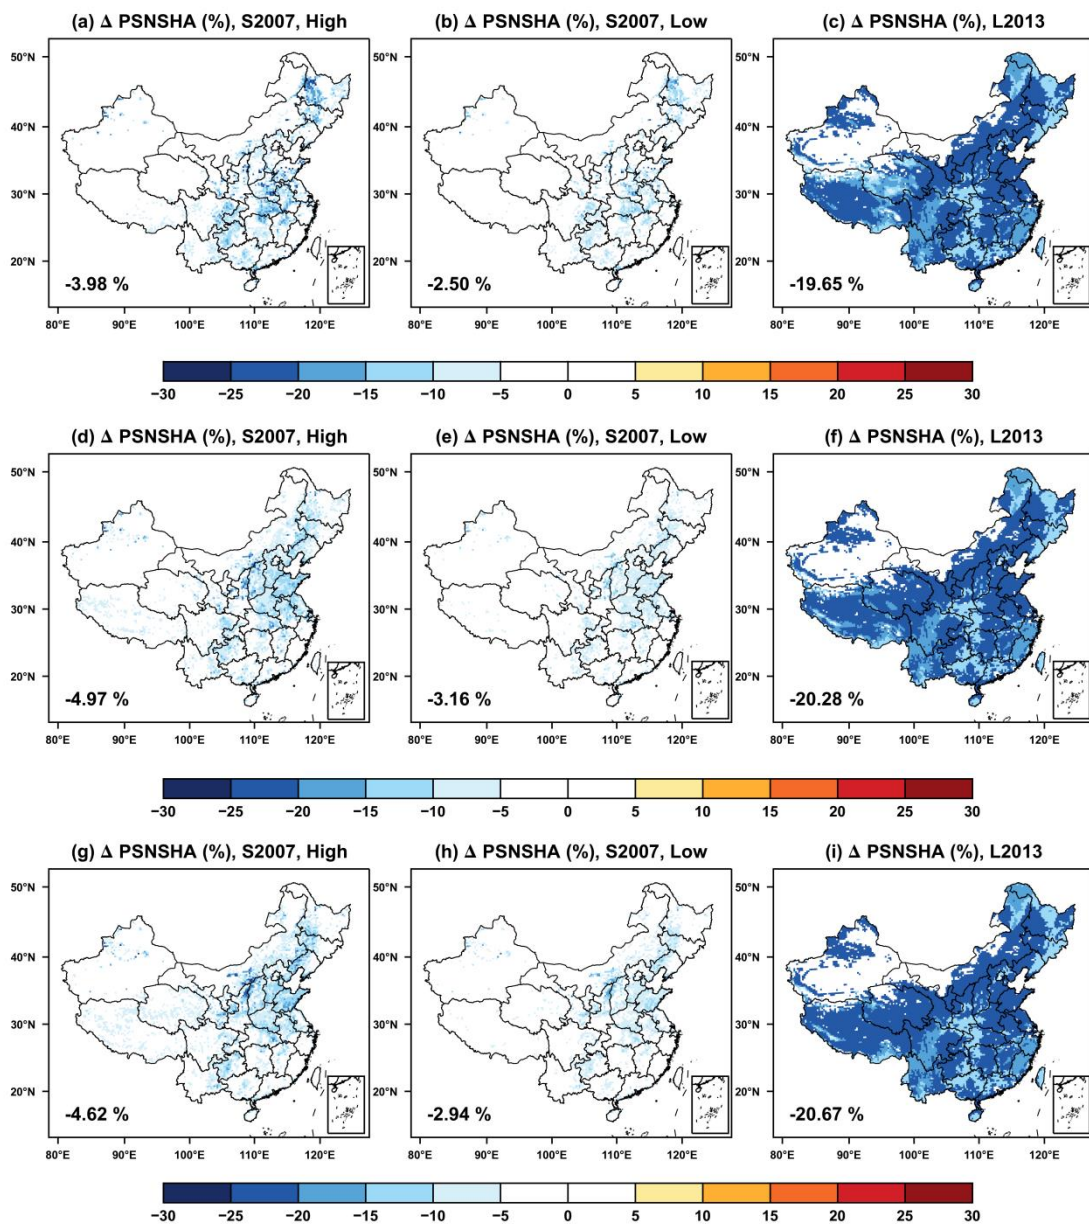

**Figure S2** The same as Fig. S1 but for the changes in photosynthesis of shaded leaves.

**Figure S3**

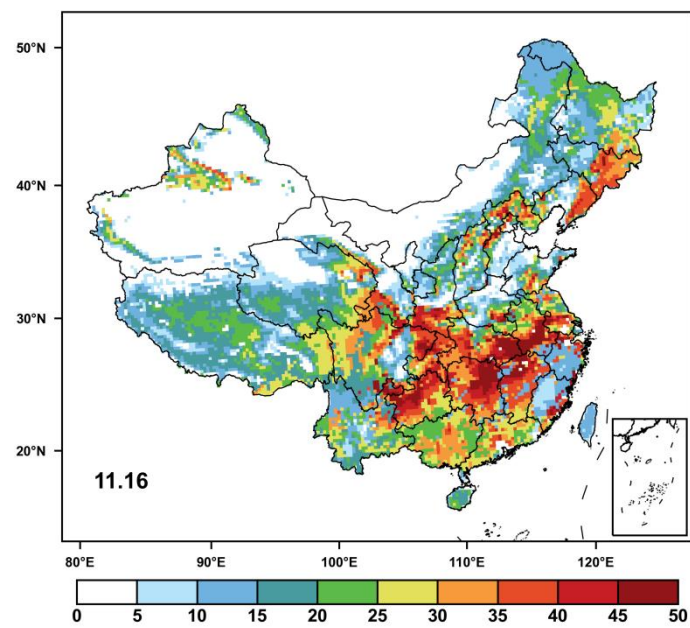

**Figure S3** Distribution of CUO (Units: mmol m<sup>-2</sup>) in China averaged for June-August. The area-weighted amount is shown in the lower left corner.

**Figure S4**

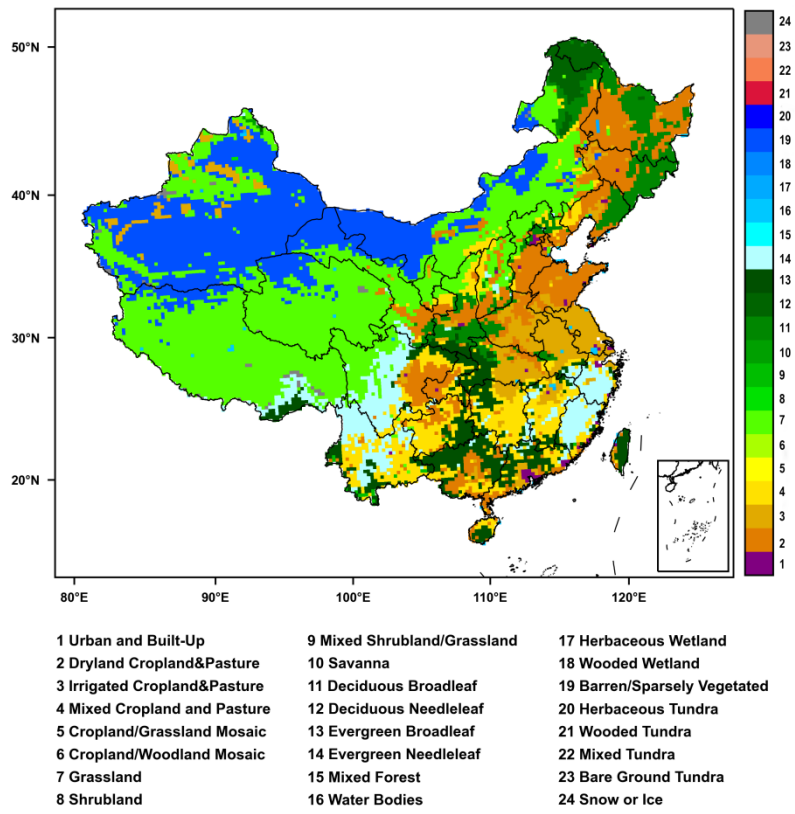

**Figure S4** Distributions of plant functional types (PFTs) in China.

**Figure S5**

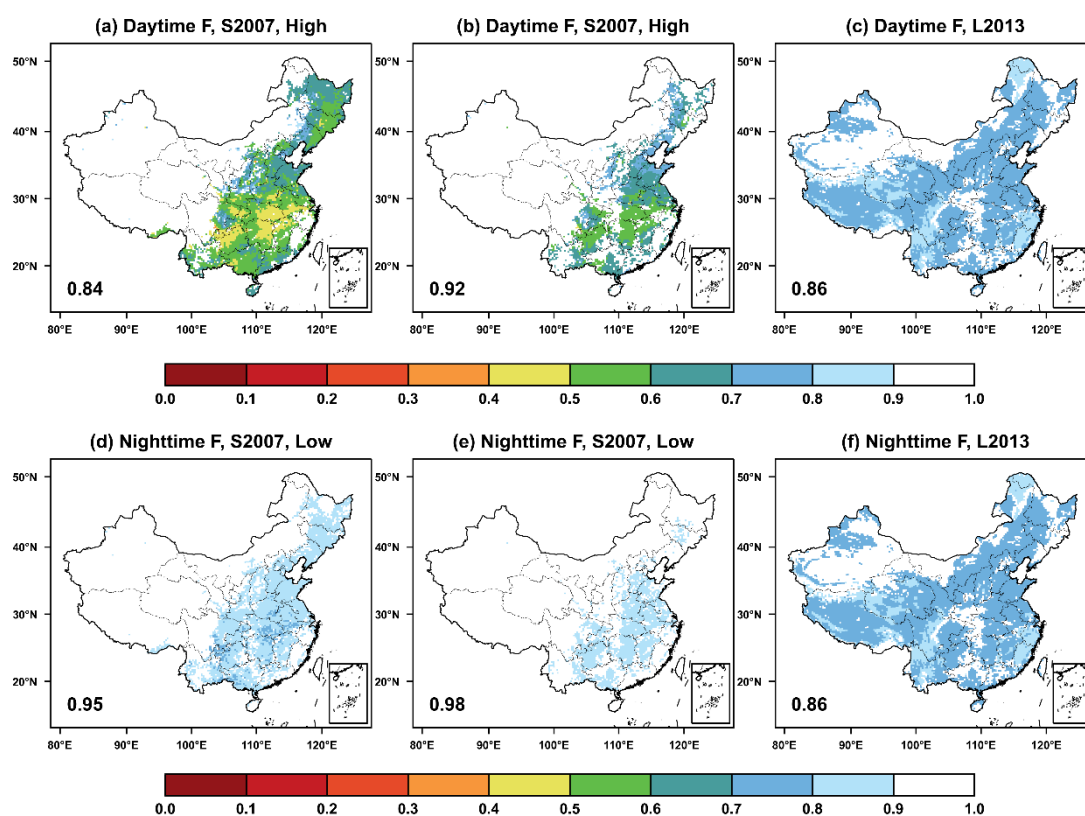

**Figure S5** The undamaged fraction by  $O_3$  ( $F$ ) predicted with the S2007 scheme using (a, d) high and (b, e) low sensitivities or the (c, f) L2013 scheme. The area-weighted percentage changes are shown in the lower left corner.

## Text S1

In NOAH-MP, stomatal resistance is calculated separately for sunlit and shaded leaves. Therefore, the undamaged fraction  $F_{(sunlit/shaded)}$  in S2007 is dependent on the sensitivity parameter  $a_{PFT}$  and excessive area-based stomatal  $O_3$  flux, which is calculated as the difference between  $f_{O_3(sunlit/shaded)}$  and threshold  $y_{PFT}$ :

$$F = 1 - a_{PFT} \times \max\{f_{O_3(sunlit/shaded)} - y_{PFT}, 0\} \quad (1)$$

The stomatal  $O_3$  flux  $f_{O_3(sunlit/shaded)}$  is calculated as:

$$f_{O_3(sunlit/shaded)} = \frac{[O_3]}{r_a + k_{O_3} \cdot r_{s(sunlit/shaded)}} \quad (2)$$

where  $r_{s(sunlit/shaded)}$  represents stomatal resistance ( $s\ m^{-1}$ ) for sunlit/shaded leaves.

For the L2013 scheme, the leaf-level CUO for sunlit and sunshade ( $mmol\ m^{-2}$ ) over the growing season is calculated as follows:

$$CUO_{(sunlit/shaded)} = \sum \left( \frac{[O_3]}{r_a + k_{O_3} \cdot r_{s(sunlit/shaded)}} \right) \quad (3)$$

$$F_{pO_3(sunlit/shaded)} = a_p \times CUO_{(sunlit/shaded)} + b_p \quad (4)$$

$$F_{cO_3(sunlit/shaded)} = a_c \times CUO_{(sunlit/shaded)} + b_c \quad (5)$$

where  $F_{pO_3(sunlit/shaded)}$  and  $F_{cO_3(sunlit/shaded)}$  are the damage ratios of photosynthesis and stomatal conductance for sunlit/shaded leaves, respectively.
